# Supplementary material for: Chemical reduction of Prussian blue nanocubes to obtain alkali ion containing cathodes and their battery applications
Source: Royal Society of Chemistry journal article supplement (doi:10.1039/d2se00171c), 2022-01-01
Supplement: d2se00171c1.pdf [file d2se00171c1.pdf]

## Electronic Supplementary Information

### Chemical Reduction of Prussian Blue Nanocubes as Alkali Ion Containing Cathodes and their Battery Applications

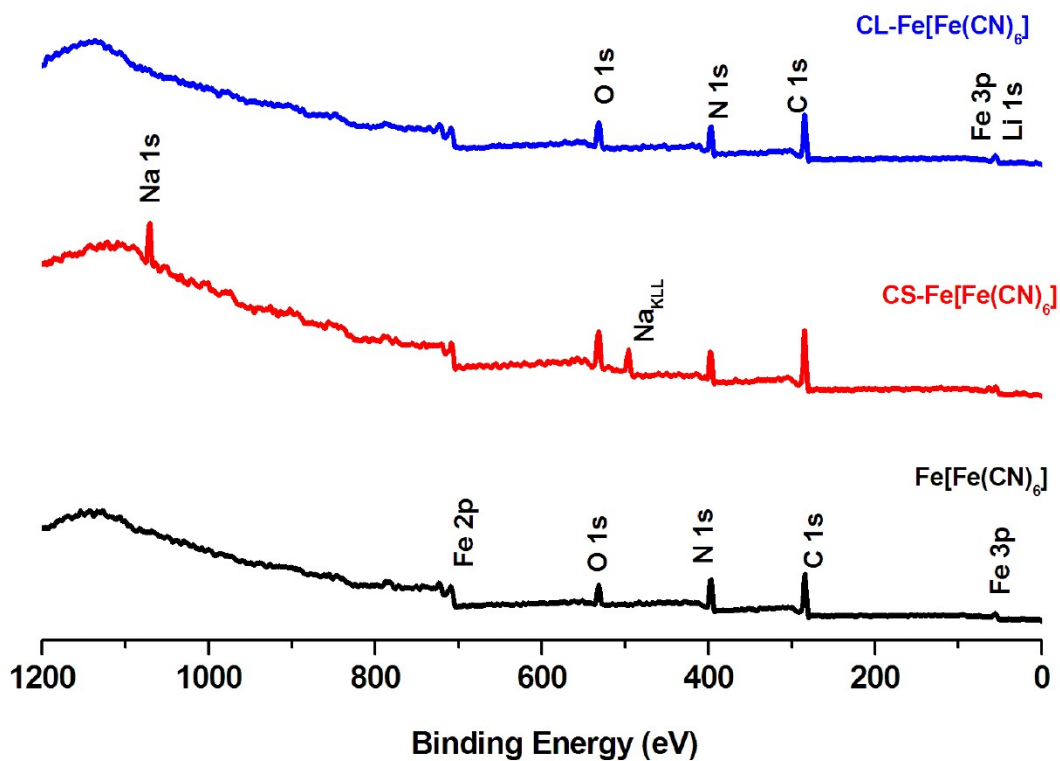

**Figure S1.** Survey spectra of Fe[Fe(CN)<sub>6</sub>], CS-Fe[Fe(CN)<sub>6</sub>] and CL- Fe[Fe(CN)<sub>6</sub>].

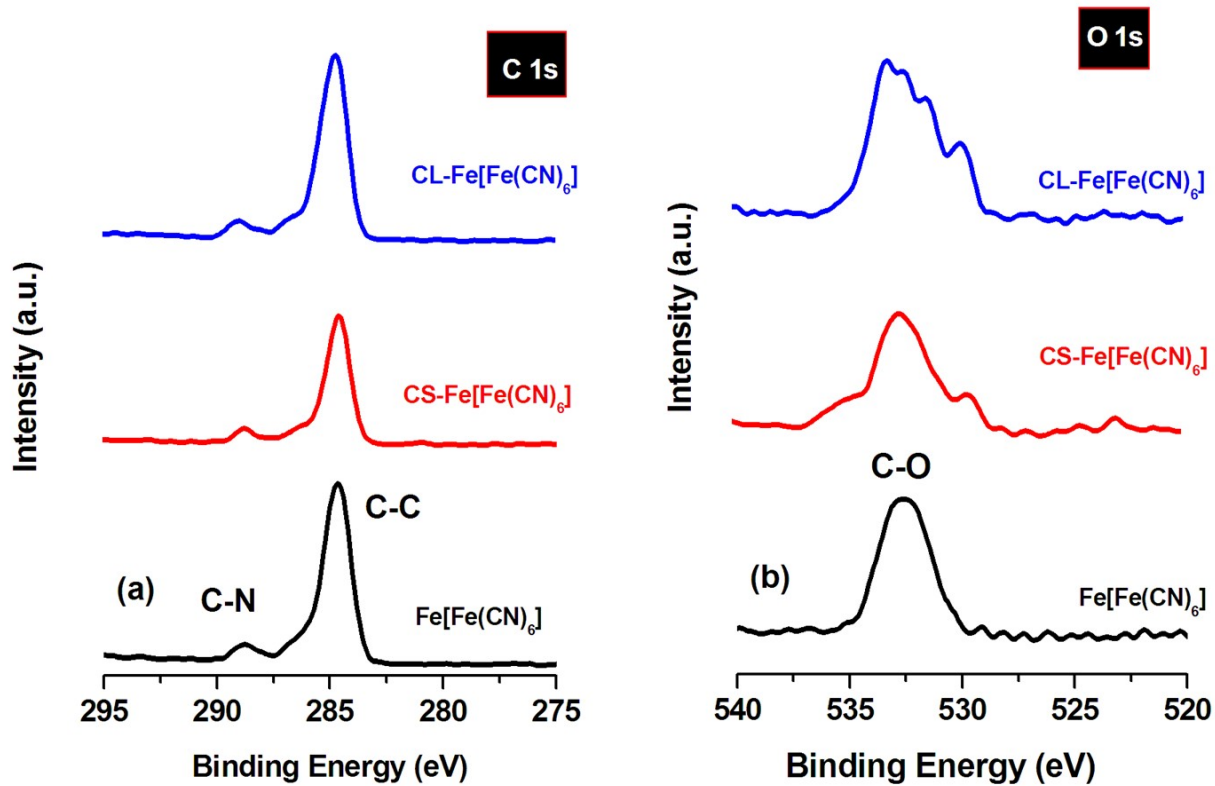

**Figure S2.** (a) High resolution XPS Spectra (a) C 1s and (b) O 1s of Fe[Fe(CN)<sub>6</sub>], CS-Fe[Fe(CN)<sub>6</sub>] and CL- Fe[Fe(CN)<sub>6</sub>].

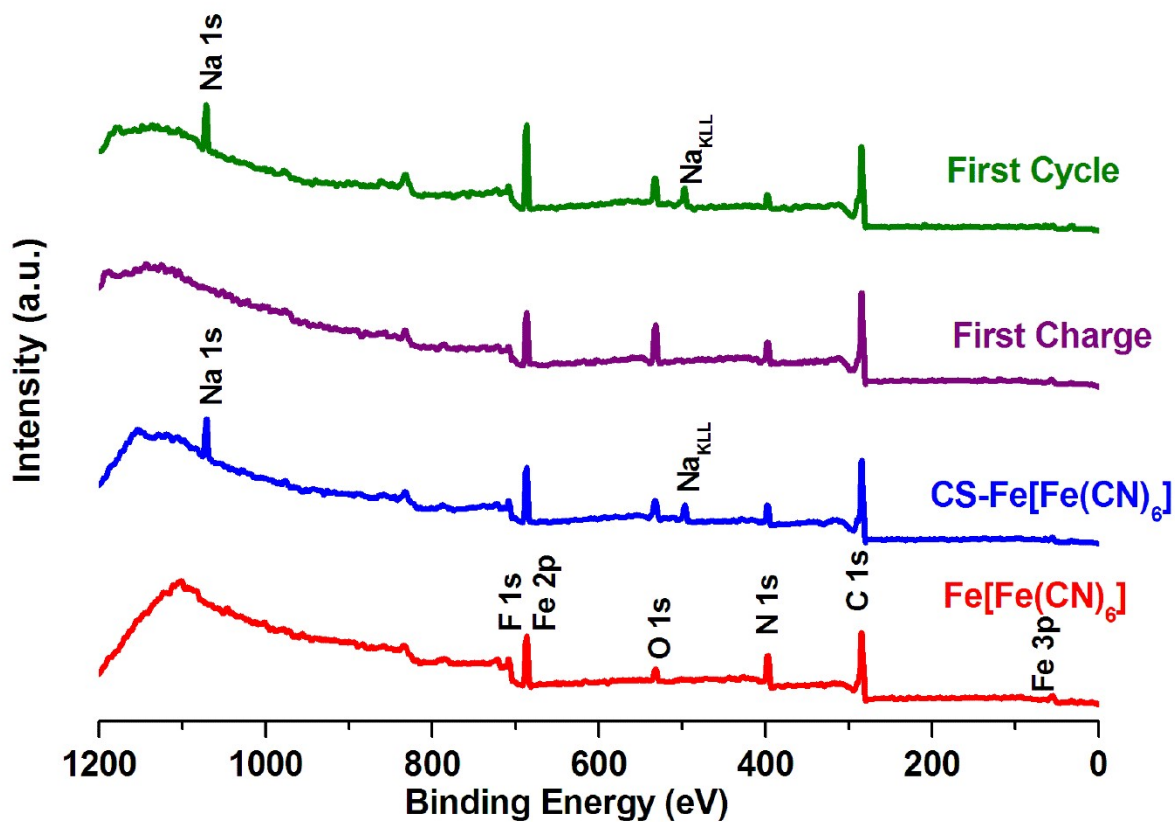

**Figure S3.** Survey spectra of Fe[Fe(CN)<sub>6</sub>], CS-Fe[Fe(CN)<sub>6</sub>] uncharged electrodes and first charge and first cycle of CS-Fe[Fe(CN)<sub>6</sub>].

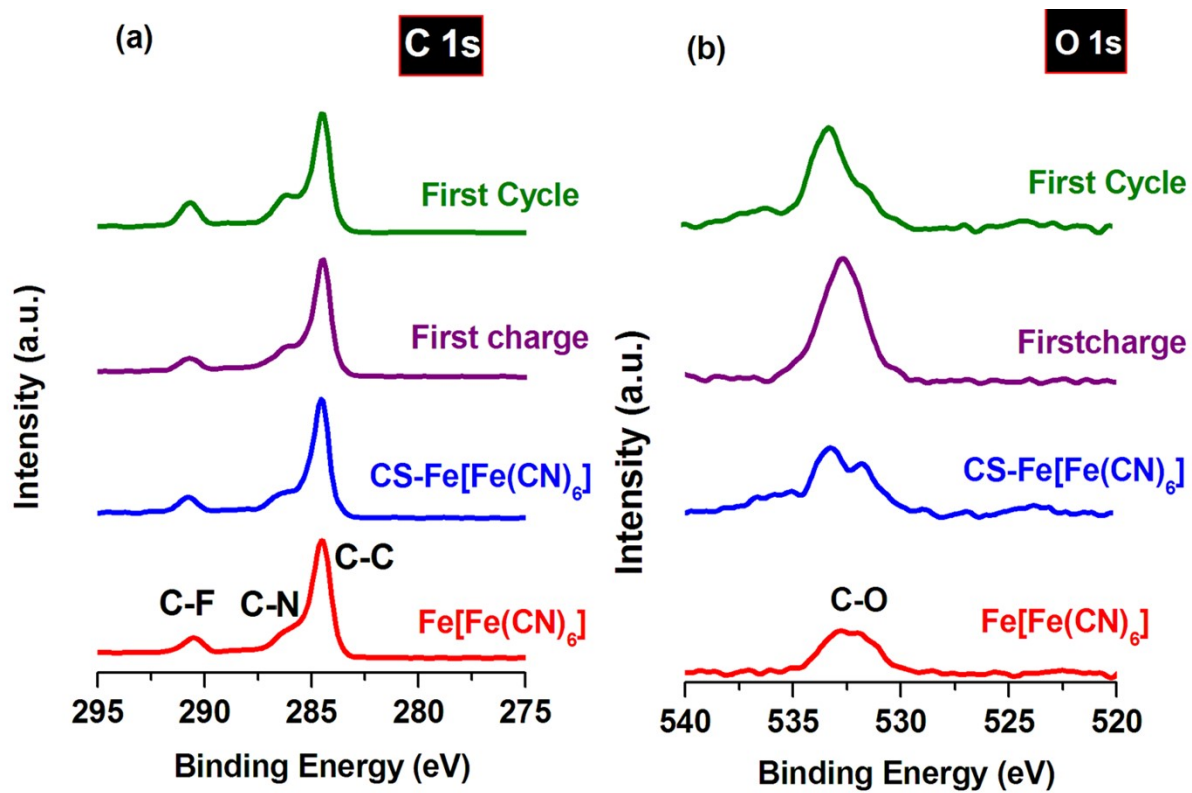

**Figure S4.** a&b C 1s and O 1s high resolution spectrum of Fe[Fe(CN)<sub>6</sub>], CS-Fe[Fe(CN)<sub>6</sub>] uncycled electrodes and first charge and first cycle of CS-Fe[Fe(CN)<sub>6</sub>]
